# Supplementary material for: Highly efficient overall water splitting driven by all-inorganic perovskite solar cells and promoted by bifunctional bimetallic phosphide nanowire arrays
Source: Royal Society of Chemistry journal article supplement (doi:10.1039/c8ta08116f), 2018-01-01
Supplement: c8ta08116f1.pdf [file c8ta08116f1.pdf]

# Highly-Efficient Overall Water Splitting Driven by All-Inorganic Perovskite Solar Cells and Promoted by Bifunctional Bimetal Phosphide Nanowire Arrays

## Authors:

Lianbo Ma,<sup>a#</sup> Wenjun Zhang,<sup>a#</sup> Peiyang Zhao,<sup>a#</sup> Jia Liang,<sup>a#</sup> Yi Hu,<sup>a</sup> Guoyin Zhu,<sup>a</sup>  
Renpeng Chen,<sup>a</sup> Zuoxiu Tie,<sup>a\*</sup> Jie Liu,<sup>ab</sup> and Zhong Jin<sup>a\*</sup>

## Affiliations:

<sup>a</sup> Key Laboratory of Mesoscopic Chemistry of MOE, School of Chemistry and  
Chemical Engineering, Nanjing University, Nanjing, Jiangsu 210023, China.

<sup>b</sup> Department of Chemistry, Duke University, Durham, North Carolina 27708, USA.

<sup>#</sup>These authors contributed equally to this work.

\*Address correspondence to: [zxtie@nju.edu.cn](mailto:zxtie@nju.edu.cn) (Dr. Z. Tie); [zhongjin@nju.edu.cn](mailto:zhongjin@nju.edu.cn)  
(Prof. Z. Jin).

**Table S1.** HER performance comparison of Ni<sub>0.5</sub>Co<sub>0.5</sub>P/CP and other representative electrocatalysts in alkaline solutions.

| Ref.      | Electrocatalysts (morphology)                                      | $\eta_{\text{onset}}$ (mV) | $\eta_{10}$ (mV) | Tafel slope (mV/dec) | Stability (Activity retention)          | Electrolyte |
|-----------|--------------------------------------------------------------------|----------------------------|------------------|----------------------|-----------------------------------------|-------------|
| This work | Ni <sub>0.5</sub> Co <sub>0.5</sub> P nanowire arrays/carbon paper | 10                         | 43               | 46.4                 | Stable for 24 h                         | 1.0 M KOH   |
| 46        | CoP nanowires/carbon cloth                                         | 38                         | 110              | 129                  | --                                      | 1.0 M KOH   |
| 47        | NiCo <sub>2</sub> S <sub>4</sub> nanowires/carbon cloth            | 230                        | --               | 141                  | Almost stable for 12 h                  | 1.0 M KOH   |
| 48        | WC nanoparticles/CNTs                                              | 16                         | 137              | 106                  | Almost stable for 1000 cycles           | 1.0 M KOH   |
| 49        | NiSn@carbon                                                        | 100                        | --               | 145                  | Slightly decreased after 100 cycles     | 1.0 M NaOH  |
| 50        | WN nanowires/carbon cloth                                          | 100                        | 285              | 170                  | --                                      | 1.0 M KOH   |
| 51        | Carbon paper/carbon tubes/Co-S                                     | 50                         | 190              | 131                  | Slightly decreased after 10,000 seconds | 1.0 M KOH   |
| 52        | NiCo-P hollow nanocubes                                            | --                         | 150              | 61                   | Slightly decreased after 100 cycles     | 1.0 M KOH   |
| 53        | Ni-Fe/nanocarbon                                                   | --                         | 219              | 110                  | Stable for 1,200 seconds                | 1.0 M KOH   |
| 54        | Co-Mo/Ti                                                           | --                         | 75               | --                   | Almost stable for 18 h                  | 1.0 M KOH   |
| 55        | Co/N-doped carbon                                                  | ~45                        | 260              | 91.2                 | Almost stable for 10 h                  | 1.0 M KOH   |

**Table S2.** OER performance comparison of Ni<sub>0.5</sub>Co<sub>0.5</sub>P/CP and other representative electrocatalysts in alkaline solutions.

| Ref.      | Electrocatalyst (morphology)                                       | $\eta_{\text{onset}}$ (mV) | $\eta_{10}$ (mV) | Tafel slope (mV/dec) | Stability (Activity retention)        | Electrolyte |
|-----------|--------------------------------------------------------------------|----------------------------|------------------|----------------------|---------------------------------------|-------------|
| This work | Ni <sub>0.5</sub> Co <sub>0.5</sub> P nanowire arrays/carbon paper | 240                        | 260              | 58.3                 | Stable for 24 h                       | 1.0 M KOH   |
| 58        | Graphene-like holey Co <sub>3</sub> O <sub>4</sub> nanosheets      | 230                        | 300              | 66                   | Almost stable after 2,000 cycles      | 0.1 M KOH   |
| 59        | Ni <sub>1</sub> Co <sub>4</sub> S@N-doped carbon frameworks        | 200                        | 280              | 64                   | Decrease obviously after 1,000 cycles | 0.1 M KOH   |
| 60        | NiCo-layered double hydroxides/carbon fiber                        | 270                        | 310              | 64                   | Decrease after 20 h                   | 1.0 M KOH   |
| 61        | Phosphorus-doped few-layer graphene                                | 250                        | 330              | 62                   | Slightly decreased after 2,000 cycles | 1.0 M NaOH  |
| 62        | CoSe <sub>2</sub> /CFC                                             | 310                        | 356              | 88                   | --                                    | 1.0 M KOH   |
| 63        | NiFe layered double hydroxide/reduced graphene oxide nanohybrid    | 240                        | 250              | 91                   | Slightly decreased after 9 h          | 1.0 M KOH   |
| 64        | Core–Shell Ni-Co Nanowire Network                                  | 250                        | 302              | 44                   | Decreased after 10 h                  | 1.0 M KOH   |
| 65        | Ni <sub>x</sub> Co <sub>3-x</sub> O <sub>4-y</sub> Nanocages       | 300                        | 320              | 53                   | --                                    | 1.0 M KOH   |
| 66        | Porous carbon cloth                                                | 300                        | 360              | 96                   | Almost stable for 27 h                | 1.0 M KOH   |
| 67        | Porous nickel–iron bimetallic selenide nanosheets                  | ~230                       | 260              | 47                   | Almost stable for 28 h                | 1.0 M KOH   |

**Table S3.** Overall water splitting performance comparison of Ni<sub>0.5</sub>Co<sub>0.5</sub>P/CP and other electrocatalysts reported in the literatures.

| Ref.      | Electrocatalyst (morphology)                                          | $\eta_{10}$ (V) | Stability (Activity retention)               | Electrolyte |
|-----------|-----------------------------------------------------------------------|-----------------|----------------------------------------------|-------------|
| This work | 3D Ni <sub>0.5</sub> Co <sub>0.5</sub> P nanowire arrays/carbon paper | 1.61            | Extremely stable for 28 h                    | 1.0 M KOH   |
| 33        | NiCo <sub>2</sub> S <sub>4</sub> nanowire arrays/Ni foam              | 1.63            | Decreased after 50 h                         | 1.0 M KOH   |
| 34        | Porous Co-P/NC nanopolyhedrons                                        | 1.71            | Decreased after 24 h                         | 1.0 M KOH   |
| 68        | Cu <sub>0.3</sub> Co <sub>2.7</sub> P/nitrogen-doped carbon (NC)      | 1.74            | Negligible catalytic deactivation after 50 h | 1.0 M KOH   |
| 69        | CoSe <sub>2</sub> nanoparticles/carbon fiber                          | 1.63            | Stable for 30 h                              | 1.0 M KOH   |
| 70        | CoO nanoparticle-doped CoSe <sub>2</sub> nanobelts                    | 2.18            | Increased for 10 h                           | 1.0 M KOH   |
| 71        | Hierarchical NiCo <sub>2</sub> O <sub>4</sub> hollow microcuboids     | 1.65            | Stable for 36 h                              | 1.0 M KOH   |
| 72        | NiSe <sub>2</sub> film/Ti foil                                        | 1.66            | Decreased for 16 h                           | 1.0 M KOH   |

**Table S4.** Performance comparison of the overall water splitting system driven by all-inorganic PSCs with the existing photocatalysis systems.

| Ref. | Photocatalysts                          | Solar to hydrogen efficiency (%) |
|------|-----------------------------------------|----------------------------------|
| 73   | Te/SnS <sub>2</sub> /Ag                 | 0.49                             |
| 74   | In <sub>0.33</sub> Ga <sub>0.67</sub> N | 3.5                              |
| 75   | Hexagonal CdS                           | 3.2                              |
| 76   | GaN-based nanowire arrays               | 1.9                              |
| 77   | Mo-doped BiVO <sub>4</sub> /Au layer    | 1.1                              |
| 78   | Carbon nitride                          | 0.12                             |

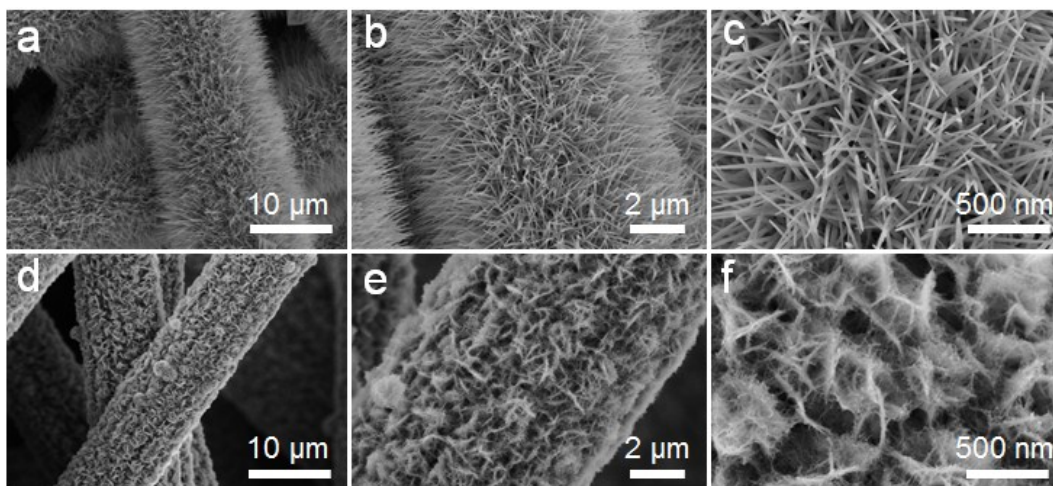

**Fig. S1.** Morphologic characterizations of control samples. SEM images of (a-c) CoP/CP and (d-f) NiP/CP.

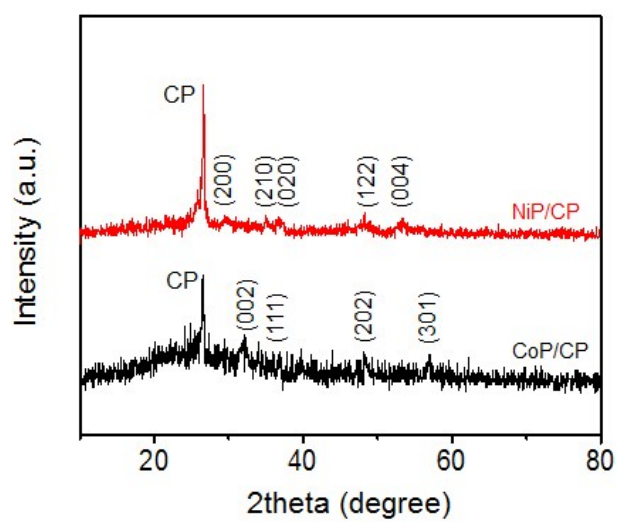

**Fig. S2.** XRD patterns of control samples (CoP/CP and NiP/CP).

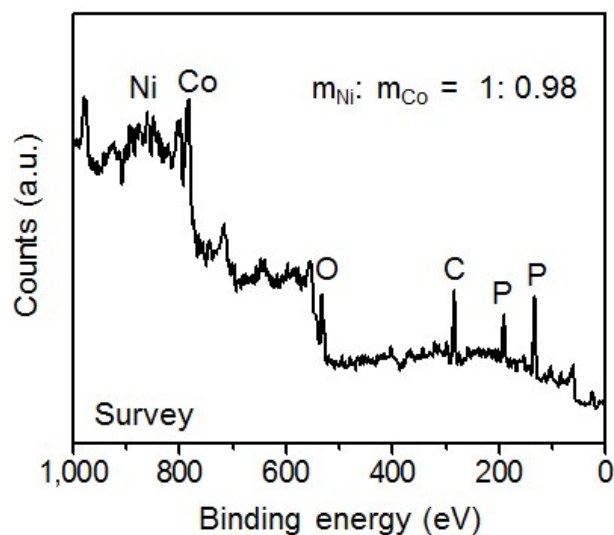

**Fig. S3.** Survey XPS spectrum of  $\text{Ni}_{0.5}\text{Co}_{0.5}\text{P}/\text{CP}$ . The molar ratio of Ni and Co elements is 1:0.98, consistent well with the initial molar ratio of Ni and Co source materials.

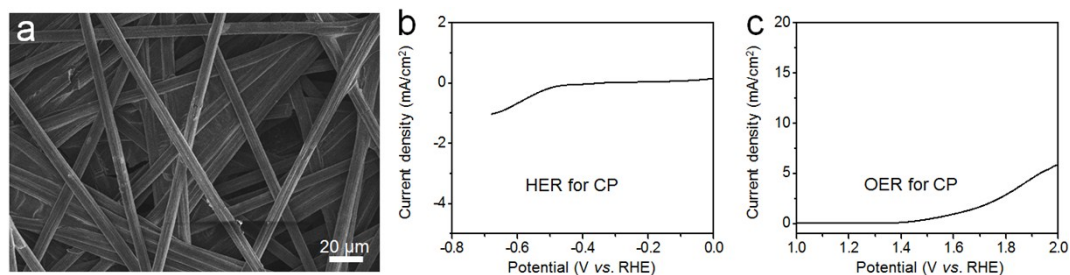

**Fig. S4.** (a) SEM image of pristine CP. (b) HER and (c) OER performances of pristine CP in 1.0 M KOH solution.

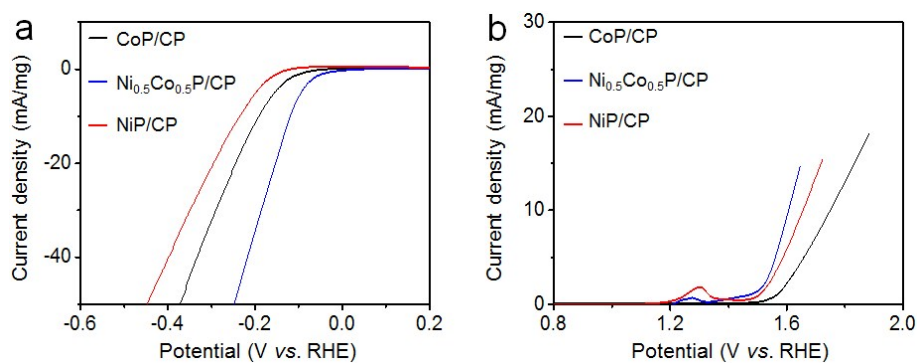

**Fig. S5.** LSV polarization curves of CoP/CP,  $\text{Ni}_{0.5}\text{Co}_{0.5}\text{P}/\text{CP}$  and NiP/CP catalysts for (a) HER and (b) OER processes.

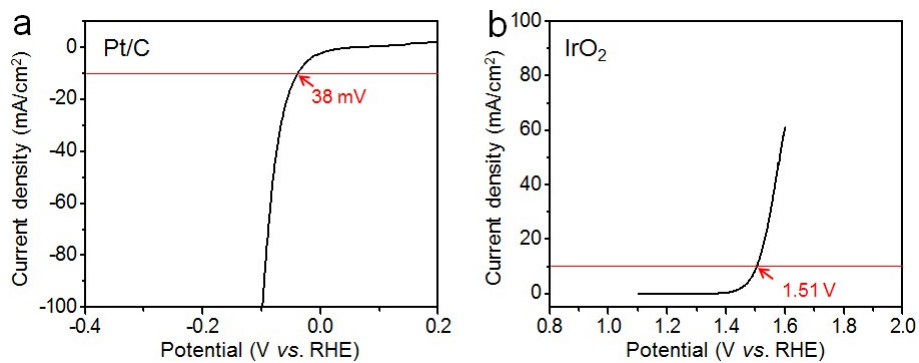

**Fig. S6.** LSV polarization curves of (a) Pt/C for HER and (b) IrO<sub>2</sub> for OER processes.

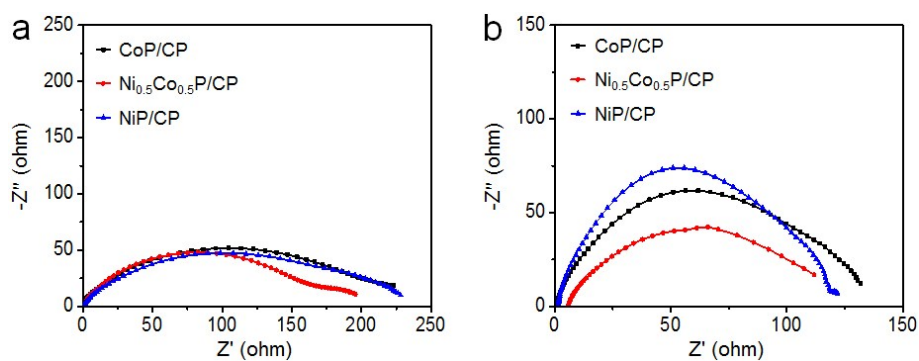

**Fig. S7.** Electrochemical impedance spectroscopy (EIS) spectra of CoP/CP, Ni<sub>0.5</sub>Co<sub>0.5</sub>P/CP and NiP/CP electrocatalysts for (a) HER and (b) OER processes.



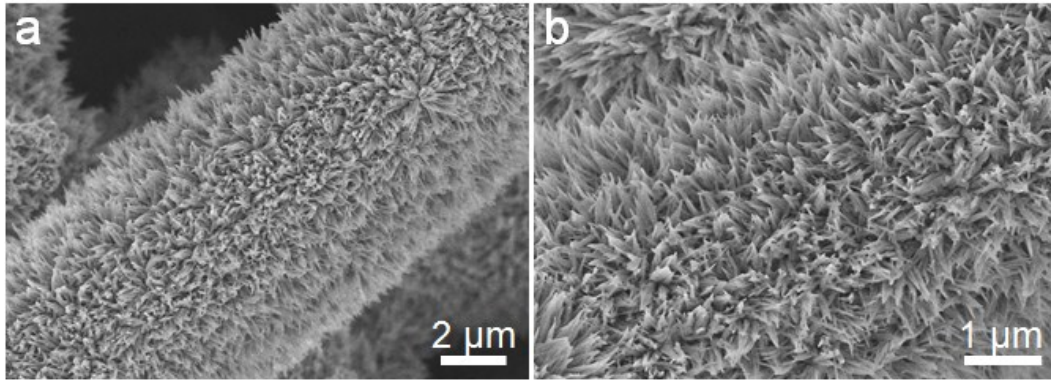

**Fig. S8.** (a, b) SEM images of  $\text{Ni}_{0.5}\text{Co}_{0.5}\text{P/CP}$  electrode after long-duration overall water splitting. The  $\text{Ni}_{0.5}\text{Co}_{0.5}\text{P/CP}$  well retains its initial morphology and nanostructure, suggesting the high structural integrity.

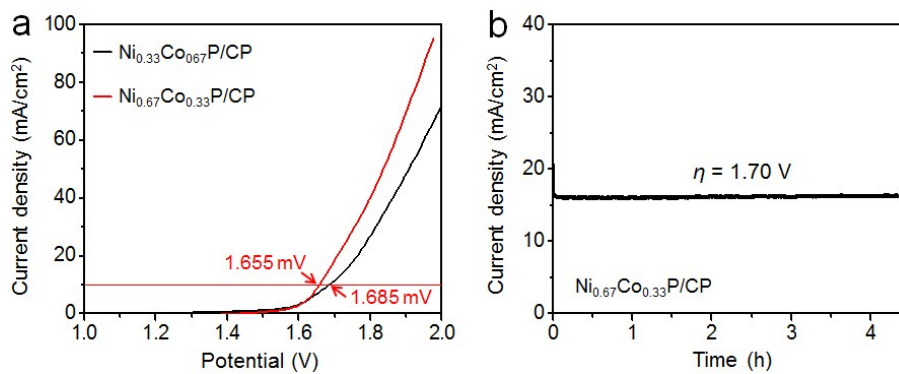

**Fig. S9.** (a) LSV polarization curves of the overall water splitting system based on  $\text{Ni}_{0.33}\text{Co}_{0.67}\text{P/CP}$  and  $\text{Ni}_{0.67}\text{Co}_{0.33}\text{P/CP}$  control samples with  $\text{Ni}_x\text{Co}_{1-x}\text{P/CP}||\text{Ni}_x\text{Co}_{1-x}\text{P/CP}$  symmetric electrode configuration. (b) Time-dependent current density of  $\text{Ni}_{0.67}\text{Co}_{0.33}\text{P/CP}||\text{Ni}_{0.67}\text{Co}_{0.33}\text{P/CP}$  electrolyzer in 1.0 M KOH solution.

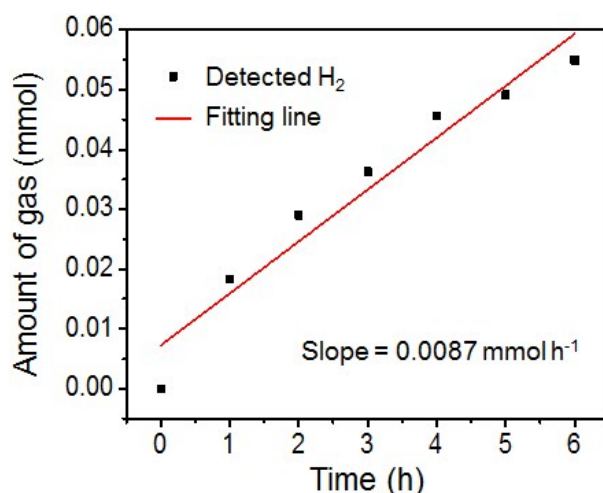

**Fig. S10.** The amount of generated H<sub>2</sub> during the long-term overall water splitting process of Ni<sub>0.5</sub>Co<sub>0.5</sub>P/CP||Ni<sub>0.5</sub>Co<sub>0.5</sub>P/CP electrolyzer driven by all-inorganic PSCs.

The overall energy conversion efficiency was calculated as follows:

$$\eta_{\text{overall}} = E_{\text{H}_2}/E_{\text{light}}$$

where  $E_{\text{H}_2}$  represents the energy of generated H<sub>2</sub> driven by all-inorganic PSCs,  $E_{\text{light}}$  stands for the total energy of simulated sunlight. The  $\eta_{\text{overall}}$  also can be calculated below:

$$\eta_{\text{overall}} = UQ \cdot F_{\text{electric-to-H}_2} / P_{\text{sunlight}} St = UI t \cdot F_{\text{electric-to-H}_2} / P_{\text{sunlight}} St$$

During the tests, after running 6 h, the detected working voltage is about 2.21 V and the Q is about 27.93 C.  $P_{\text{sunlight}}$  is 100 mW cm<sup>-2</sup>, S is the total active area of all-inorganic PSCs for absorbing sunlight ( $2 \times 0.18$  cm<sup>2</sup>).

According to Fig. S10, the mole number of generated H<sub>2</sub> (n) after 6 h is about 0.0549 mmol. Thus, the  $\eta_{\text{overall}}$  can be obtained:

$$\eta_{\text{overall}} = UQ \times (2 \times 6.02 \times 10^{23} \times 54.9 \times 10^{-6} \times 1.66 \times 10^{-19} / Q) / P_{\text{sunlight}} St$$

Therefore, the  $\eta_{\text{overall}}$  can be calculated to be 3.12%.
